1 **Title:** Activity-dependent alteration of early myelin ensheathment in a developing sensory circuit

2 **Authors and affiliations**

3 Zahraa Chorghay<sup>1</sup>, David MacFarquhar<sup>2</sup>, Vanessa J. Li<sup>1</sup>, Sarah Aufmkolk<sup>1,2</sup>, Anne Schohl<sup>1</sup>, Paul  
4 W. Wiseman<sup>2</sup>, Ragnhildur Thora Káradóttir<sup>3</sup>, Edward S. Ruthazer<sup>1</sup>

5 <sup>1</sup>Montreal Neurological Institute-Hospital (MNI) and Department of Neurology and Neurosurgery,  
6 McGill University, 3801 Rue University, Montréal, QC H3A 2B4, Canada;

7 <sup>2</sup>Departments of Chemistry and Physics, Otto Maass Building, McGill University, 801 Sherbrooke  
8 Street West, Montréal, QC H3A 0B8, Canada;

9 <sup>3</sup>Wellcome Trust-Medical Research Council Cambridge Stem Cell Institute and Department of  
10 Veterinary Medicine, University of Cambridge, Tennis Court Road, Cambridge CB2 1QR, UK.

11 \* **Corresponding Author:** Edward S. Ruthazer <[edward.ruthazer@mcgill.ca](mailto:edward.ruthazer@mcgill.ca)>

12 **Abstract**

13 Adaptive myelination has been reported in response to experimental manipulations of neuronal  
14 activity, but the links between sensory experience, corresponding neuronal activity, and resultant  
15 alterations in myelination require investigation. To study this, we used the *Xenopus laevis* tadpole,  
16 which is a classic model for studies of visual system development and function because it is  
17 translucent and visually responsive throughout the formation of this retinotectal system. Here, we  
18 report the timecourse of early myelin ensheathment in the *Xenopus* retinotectal system using  
19 immunohistochemistry of myelin basic protein (MBP) along with third-harmonic generation (THG)  
20 microscopy, a label-free structural imaging technique. Characterization of the myelination  
21 progression revealed an appropriate developmental window to address the effects of early  
22 patterned visual experience on myelin ensheathment. To alter patterned activity, we showed  
23 tadpoles stroboscopic stimuli and measured the calcium responses of retinal ganglion cell axon  
24 terminals. We identified strobe frequencies that elicited robust versus dampened calcium  
25 responses, reared animals in these strobe conditions for 7 d, and subsequently observed  
26 differences in the amount of early myelin ensheathment at the optic chiasm. This study provides  
27 evidence that it is not just the presence but also to the specific temporal properties of sensory  
28 stimuli that are important for myelin plasticity.

## 29 **Introduction**

30 The development and function of brain circuits relies crucially upon precise timing of neuronal  
31 inputs. By insulating axons to regulate the conduction velocity of these inputs, myelination may  
32 optimize temporal control over information processing, with implications for synchrony in vertebrate  
33 circuits(1, 2). Effects of experience and training on biomarkers of myelination have been reported  
34 with white matter imaging techniques and with cellular level investigations(3, 4). These cellular level  
35 changes have been studied using extreme manipulations of axonal activity or vesicular release,  
36 including sensory deprivation, chronic pharmacological treatment, genetic manipulations, and  
37 electrical and optogenetic stimulation(3-5). However, the links between patterns of sensory  
38 experience, corresponding neuronal activity, and myelination have yet to be fully elucidated. To  
39 study how sensory patterned activity alters myelination during circuit development, we took  
40 advantage of the *Xenopus* retinotectal system, which is amenable to imaging, shows precocious  
41 visual responsiveness, and has been extensively studied in the context of the effects of patterned  
42 activity on synaptic plasticity, structural remodeling, and topographic circuit refinement(6).

## 43 **Results and Discussion**

44 To observe myelin ensheathment, we used an antibody against myelin basic protein (MBP), which  
45 showed expected band sizes for MBP isoforms (19 and 22 kDa) on Western blots of adult *Xenopus*  
46 brain lysate, in accordance with the reported molecular weights of MBP isoforms in *Xenopus*(7)  
47 and other species(8) (Fig 1A). The pattern of MBP immunostaining reflected the laminar  
48 organization of the adult optic tectum(9) (Fig 1B), and in the hindbrain was similar to  
49 immunostaining for myelin proteolipid protein reported in stage 49 tadpoles(10) (Fig 1C). We cross-  
50 validated immunostaining with third-harmonic generation (THG) microscopy, an emerging label-  
51 free technique that has been used to image the presence of myelin in the peripheral and central  
52 nervous systems(11, 12). THG microscopy reveals sub-micrometer heterogeneities produced at  
53 optical interfaces, allowing it to be used as a structural imaging tool in unstained samples(13).  
54 Strong THG signal was observed in a subset of MBP-positive fibers and increased at later  
55 developmental stages in both the hindbrain (Fig 1D) and optic chiasm (Fig 1E), consistent with the  
56 developmental progression from new ensheathment by MBP-positive processes to increasingly  
57 compact myelin, giving stronger THG signal. Because MBP expression was highly specific and  
58 preceded the onset of robust THG signal, we used MBP immunostaining for the rest of this study  
59 to investigate effects from the onset of myelination.

60 We studied MBP expression in stage 48 to 54 tadpoles, a relevant developmental period  
61 when tadpoles have just transitioned from relying on their yolk sack for nutrition to active  
62 feeding(14) and show more complex sensorimotor behaviors in response to environmental cues.  
63 Immunostaining for MBP alongside monoclonal antibody 3A10 staining of a neurofilament-  
64 associated antigen that preferentially labels retinal ganglion cell (RGC) axons(15) and a subset of

65 reticulospinal projections(16) revealed myelination progression in the optic chiasm (Fig 1F).  
66 Overall, MBP expression follows a caudal-to-rostral progression in the tadpole brain, highlighted  
67 by comparing changes between stage 48 and stage 51 (Fig 1G).

68 Based on our characterization of myelin ensheathment, we identified stage 48 as the  
69 appropriate developmental stage in which to investigate how visual experience modulates MBP  
70 expression. Strobe rearing has been previously shown to synchronize RGC firing and modulate  
71 topographic map refinement in the optic tectum of *Xenopus*(17) and in goldfish(18). We used  
72 various frequencies of stroboscopic stimuli (“strobe”) to physiologically induce temporally patterned  
73 activity in the retinotectal system (Fig 2A). When animals were exposed to strobe, robust calcium  
74 responses in RGC axons were evoked by 0.0625 Hz (“slow”) but not by 1 Hz (“fast”) strobe (Fig  
75 2C-F). The Fourier power spectra for these calcium responses showed peaks corresponding to the  
76 specific frequencies for slow (Fig 2G) and fast (Fig 2H) strobe. Comparing the power at the stimulus  
77 frequencies revealed significantly more power associated with the slow than the fast strobe in each  
78 of the animals measured (Fig 2I), most likely due to the phenomenon of temporal frequency  
79 adaptation(19).

80 We therefore raised animals for 7 d under slow or fast strobe conditions or dim ambient light.  
81 We chose ambient light as the control since darkness is known to lead to spontaneous local  
82 bursting that can drive waves of correlated retinal activity even in the absence of vision(20).  
83 Tadpoles were fixed and immunostained, and high-resolution confocal stack images of the optic  
84 chiasm were acquired. From these photomontages, 3D digital reconstructions of MBP and 3A10  
85 profiles were used to quantify the total volume of MBP-associated RGC axons at the chiasm (Fig  
86 2J–M). Significantly greater axonal volume was associated with MBP in animals reared under slow  
87 versus fast strobe (Fig2J). Overall, our data show that slow strobe, which reliably evoked robust  
88 non-adapting calcium responses in RGC axons, increased the axonal volume associated with MBP,  
89 whereas fast strobe, which was associated with weak, adapting calcium responses, produced a  
90 reduction in ensheathed axonal volume at the chiasm. Dim ambient light-reared tadpoles showed  
91 an intermediate level of myelin ensheathment.

92 Our observation that sensory experience alters myelin is consistent with previous reports(3-  
93 5). The differential effect of firing frequency on myelination has been shown with electrical  
94 stimulation in co-cultures of dorsal root ganglion neurons and Schwann cells(21) and in the corpus  
95 callosum(22). Our findings extend this literature, showing that patterned *sensory experience* of the  
96 organism affects MBP expression, with increased myelination under stimulus conditions that elicit  
97 elevated, repetitive axonal firing. An ongoing debate is whether activity-dependent myelination may  
98 merely reflect changes in axonal morphology, including arbor elaboration(23) or stability of axon  
99 terminals(24) rather than neuronal activity itself. However, since we studied myelination along the  
100 axonal tract at the optic chiasm, changes in MBP expression here are unlikely to be influenced by  
101 axonal terminal branch morphogenesis.

102           That patterned activity can affect myelin ensheathment hints at the possibility of shared  
103 mechanisms for the control of timing-dependent plasticity and myelination during circuit  
104 development. Stimulation of spinal cord axons in the zebrafish affects calcium transients in  
105 contacting oligodendrocytes, which then predict myelin sheath dynamics(25, 26), reminiscent of  
106 correlations between calcium and structural dynamics of neurons for activity-dependent plasticity.  
107 Furthermore, specific patterns of neuronal activity induce distinct programs of gene expression(27),  
108 conceivably leading to changes in the expression of myelin-related genes. By regulating the speed  
109 of action potentials, myelin plasticity may contribute to the precise temporal synchrony and to  
110 oscillations in functional circuits(1), as supported by computational modelling: changes in  
111 conduction velocity through adaptive myelination allow for more robust synchronization of the  
112 network than can be accounted for by synaptic gain alone(2). Lastly, disorders such as autism and  
113 schizophrenia have been linked to myelin abnormalities and to dysregulation of temporal  
114 synchrony, highlighting the potential importance of experience-dependent myelination in circuit  
115 development and refinement.

#### 116 **Acknowledgements**

117 We thank Drs. Alyson Fournier, Barbara Morquette, Nelly Vuillemin, Nicholas Marsh-Armstrong,  
118 and Tim Kennedy for their scientific advice, as well as the MNI Microscopy Core Facility and the  
119 McGill Advanced Bioimaging Facility. This work was funded by Fonds de recherche du Québec–  
120 Santé (Grant 31036; ER), MNI–Cambridge Collaboration Grant (RTK & ER) and Douglas Avrith  
121 Award (ZC), European Research Council Horizon 2020 Research and Innovation Programme  
122 (Grant 771411; RTK), Natural Sciences and Engineering Research Council of Canada (NSERC)  
123 Discovery Grant to PWW, and NSERC and McGill University Integrated Program in Neuroscience  
124 Scholarships to ZC and VJL.

## Figures

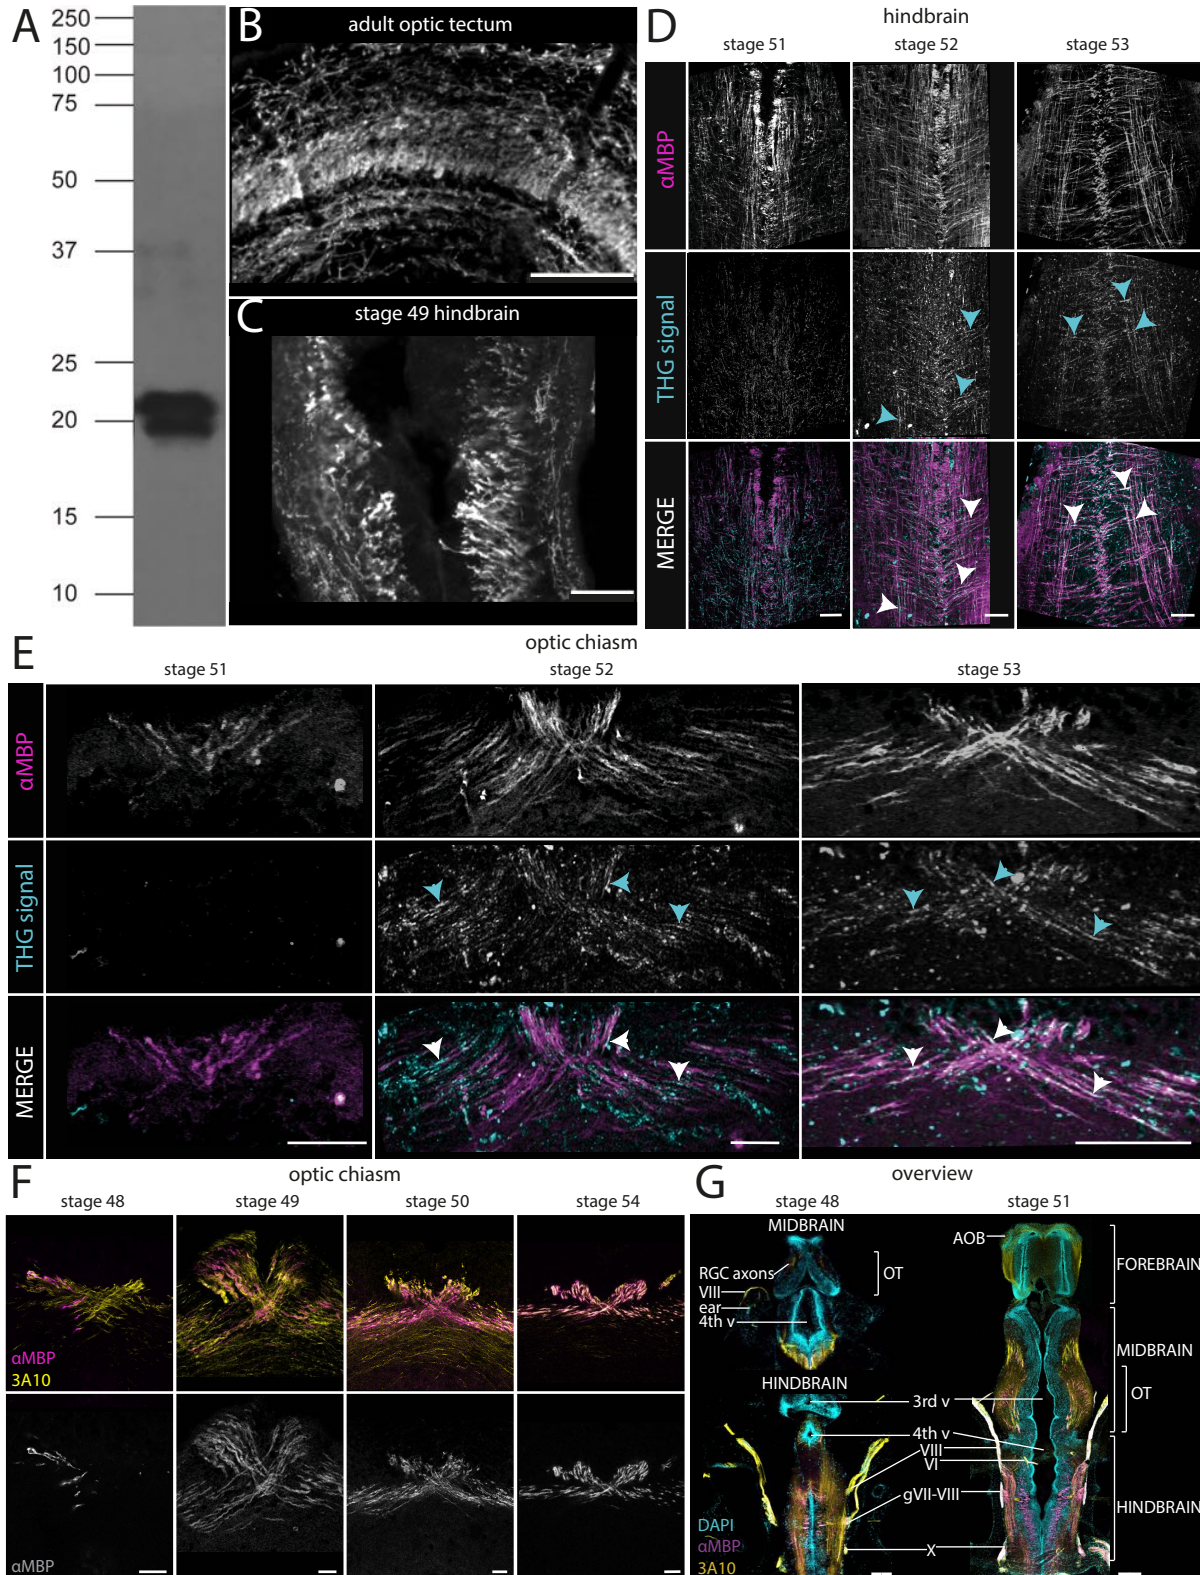

125 **Figure 1 Investigation of early myelin ensheathment in the *Xenopus laevis* tadpole**  
126 **retinotectal system.** (A) Western blot using anti-MBP antibody on *Xenopus* adult brain lysate  
127 shows expected band sizes of 19 kDa and 22 kDa. (B) THG microscopy of the optic chiasm,  
128 showing two-photon MBP immunofluorescence aligned to THG signal in the same sections of  
129 tadpole stages 51 to 53. THG signal intensifies later in development than MBP expression,  
130 suggesting more compact myelin. Arrows: examples of fibers with both THG and MBP  
131 immunofluorescence signal. Colors:  $\alpha$ MBP (magenta), THG (cyan). Scale bar: 40  $\mu$ m. (C, D)  
132 Developmental progression of early myelin ensheathment in the retinotectal system, including the  
133 optic (C) chiasm beginning at stage 48 and (D) tectum starting at stage 51. Scale bar: 20  $\mu$ m. (E)  
134 The caudo-rostral progression of myelin expression in the brain between stages 48 and 51. Scale  
135 bar: 100  $\mu$ m. (C-E) Colors:  $\alpha$ MBP (magenta, grey), 3A10 (yellow), DAPI (cyan). (B-E) Horizontal  
136 sections, oriented with rostral toward the top of the panel.

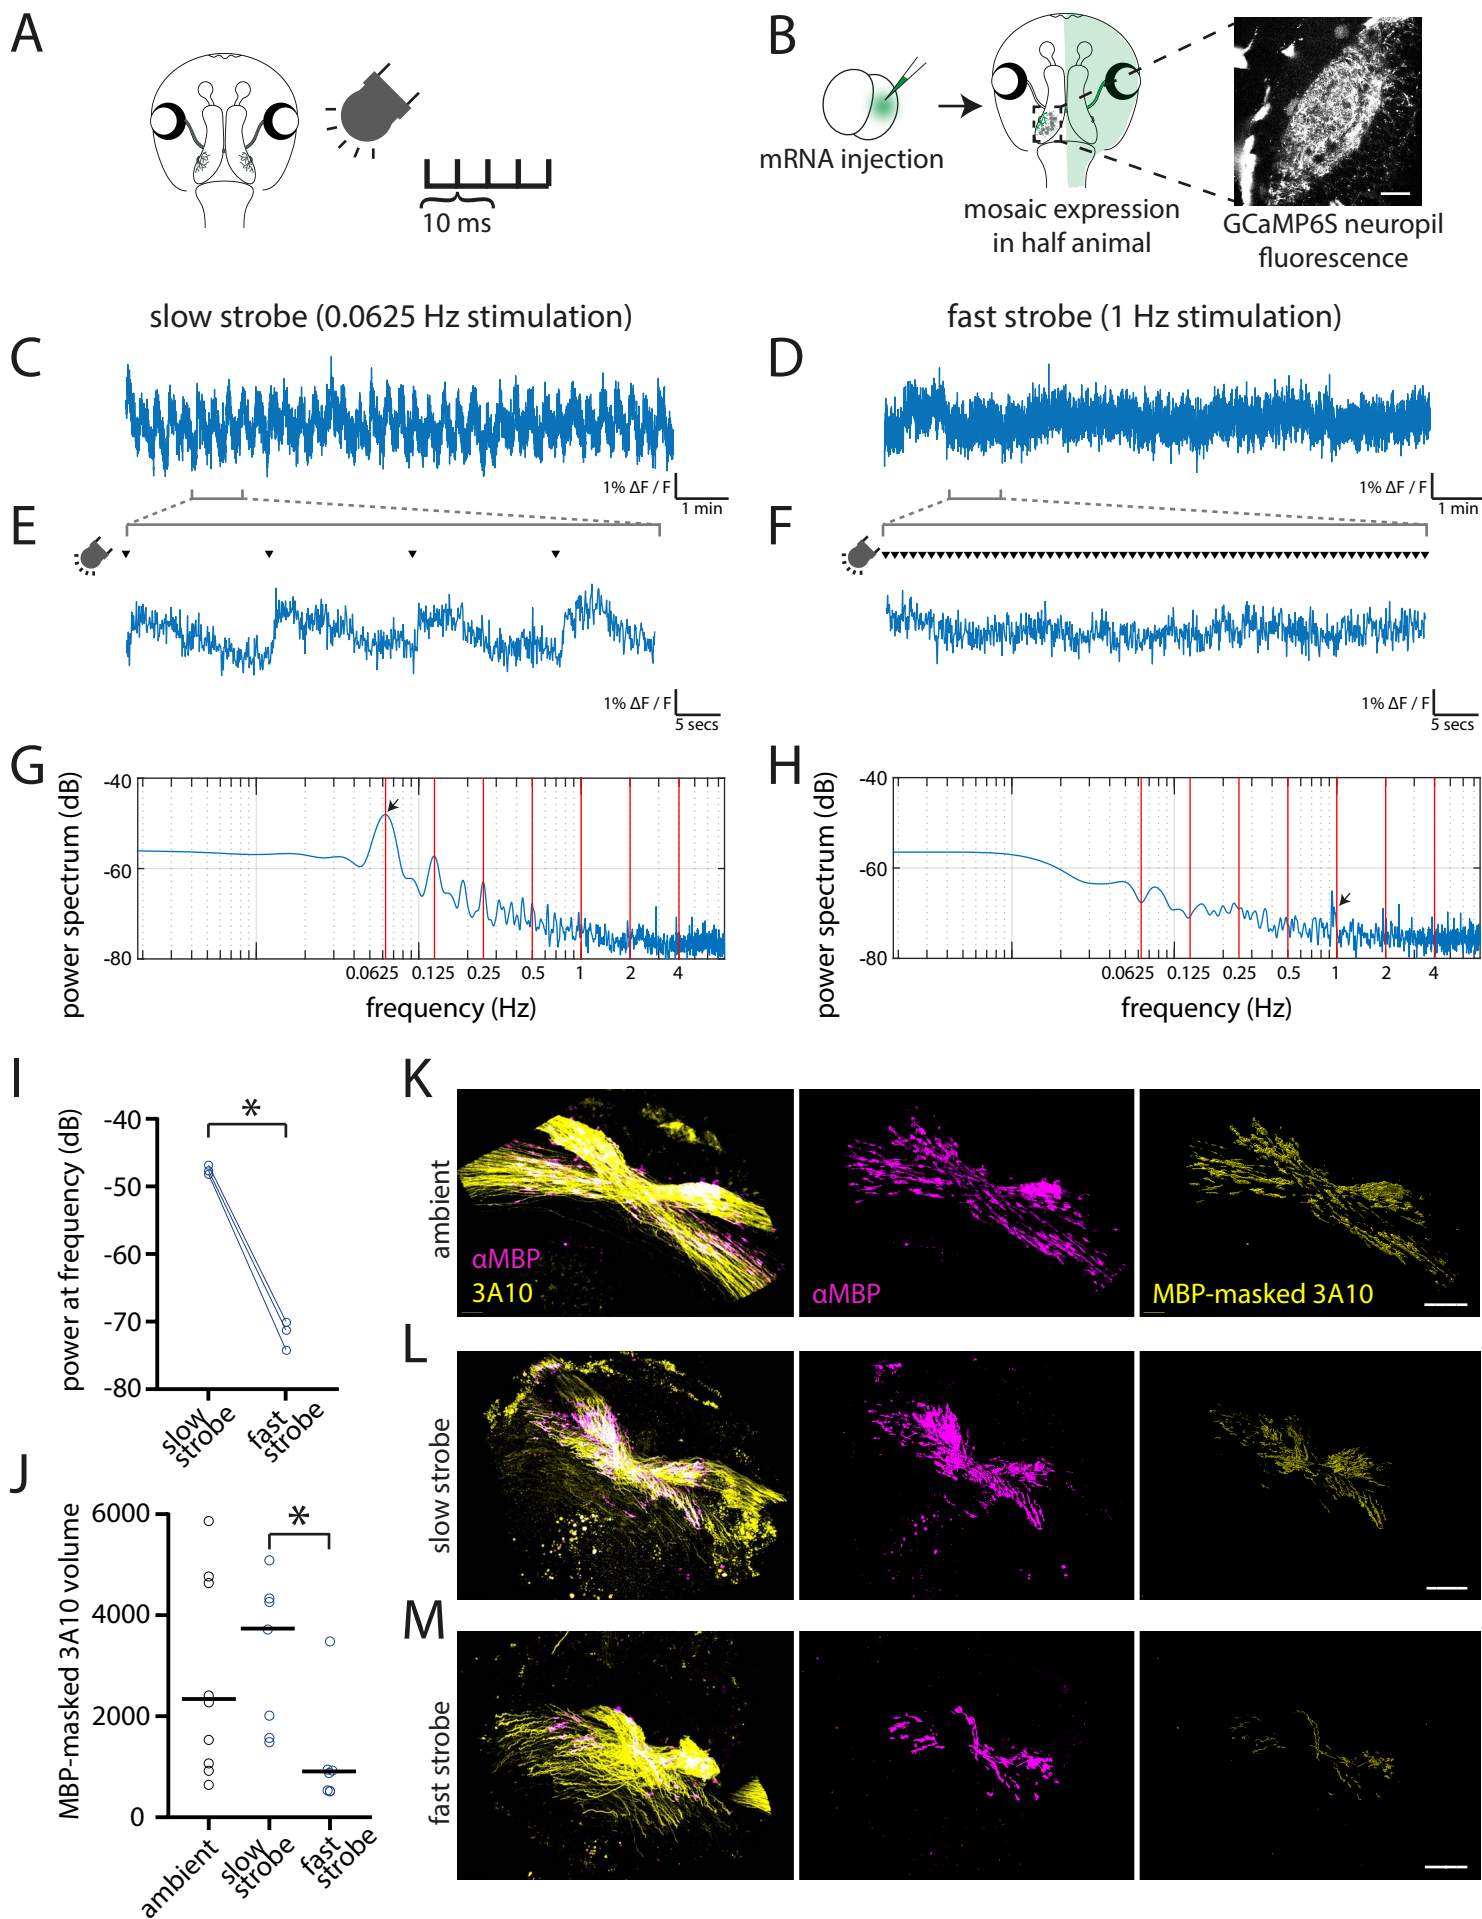

137 **Figure 2 Activity-dependent effects on MBP expression in the retinotectal system with**  
138 **stroboscopic visual stimulation.** (A) *Xenopus* tadpoles were exposed to 10 ms stroboscopic  
139 flashes at a range of frequencies. (B) For two-photon calcium imaging of RGC axon terminals in  
140 the optic tectum, tadpoles with bilateral mosaic GCaMP6s expression restricted to half the animal  
141 were generated by microinjection of GCaMP6s mRNA into one blastomere at the two-cell stage of  
142 development. Scale bar: 40  $\mu\text{m}$ . (C,D) Representative tectal neuropil axonal calcium responses to  
143 the (C) slow strobe (0.0625 Hz) and (D) fast strobe (1 Hz) stimuli over 10 min and zoomed in to a  
144 (E,F) 1 min period. Arrowhead: LED flashes during strobe stimulation. (G, H) Fourier power spectra  
145 of calcium responses in (C, D). Arrow: peak in power corresponding to strobe frequency. (I) Power  
146 at the stimulus frequency was significantly greater for slow rather than fast strobe in each animal  
147 ( $n = 3$ , paired t-test,  $*p = 0.0034$ ). (J-M) Animals were raised under ambient light, slow or fast strobe  
148 for 7 d, and their optic chiasm digitally reconstructed in 3D. (J) Quantification of the MBP-masked  
149 3A10 volume showed differences between the three conditions.  $n = 9$  for ambient, 7 for slow strobe,  
150 6 for fast strobe. Line: median. Kruskal-Wallis test:  $*p = 0.0187$ , Dunn's test for multiple  
151 comparisons:  $*p = 0.0288$  for slow versus fast strobe. (K – M) Representative snapshots of the  
152 reconstructions for the (K) ambient, (L) slow, and (M) fast strobe conditions. Colors:  $\alpha$ MBP  
153 (magenta), DAPI (cyan), 3A10 (yellow). Scale bar: 20  $\mu\text{m}$ .



## 154 **Materials and Methods**

### 155 **Experimental Model and Subject Details**

156 All procedures were approved by the Animal Care Committee of the Montreal Neurological Institute  
157 at McGill University in accordance with Canadian Council on Animal Care guidelines. For the  
158 developmental progression, tadpoles were acquired from Boreal Science (RRID:XEP\_Xla100).  
159 Upon receiving them, they were staged as per Nieuwkoop and Faber(14) and immediately fixed for  
160 sectioning and immunostaining.

161 For the calcium imaging experiment, we generated bilateral mosaic tadpoles, with  
162 fluorescent protein expression restricted to one-half of the animal (described in detail by Benfey et  
163 al(28)). Briefly, female albino *Xenopus laevis* frogs (RRID:XEP\_Xla300) from our in-house breeding  
164 colony were primed with 50 IU pregnant mare serum gonadotropin (PMSG; Prospec Bio HOR-  
165 272), and 3 d later, were injected with 400 IU human chorionic gonadotropin (hCG; Sigma-Aldrich  
166 CG10; RRID:SCR\_018232). The following day, eggs from primed females were collected for in  
167 vitro fertilization and co-injection of GCaMP6s and mCherry messenger RNA (mRNA) into one  
168 blastomere of two-cell stage embryos. Several days after injection, we screened for animals with  
169 unilateral mCherry and high levels of GCaMP fluorescence for use in calcium imaging experiments.

170 For the strobe-rearing experiments, 2-3 d after priming females with 50 IU PMSG, 400 IU  
171 hCG was injected into females and 150 IU into males to induce mating. Fertilized eggs were  
172 collected the following day and raised in 0.1X Modified Barth's Solution with HEPES (MBSH)  
173 prepared from 10X MBSH stock solution (88 mM NaCl, 1 mM KCl, 2.4 mM NaHCO<sub>3</sub>, 0.82 mM  
174 MgSO<sub>4</sub> x 7H<sub>2</sub>O, 0.33 mM Ca(NO<sub>3</sub>)<sub>2</sub> x 4H<sub>2</sub>O, 0.41 mM CaCl<sub>2</sub>, 10 mM HEPES, pH 7.4). Once  
175 animals reached stage 48, they were placed in a 6-well plate in a box that blocked out external  
176 light, while exposed to a LED array composed of green luxeon LEDs controlled by a Master 8  
177 Stimulator (A.M.P.I.). Animals were exposed to stroboscopic stimuli with 10 ms full-field light flashes  
178 presented at different frequencies or to constant illumination at the same intensity ("ambient") for 7  
179 d. MBSH media and Sera-Micron 50ml growth food for fish and amphibians (Sera) was refreshed  
180 every 1-2 d.

### 181 **Western blot**

182 Samples were prepared from adult male *Xenopus* brain. After adult males were anesthetized in  
183 0.2% MS-222 (Sigma A5040) and decapitated, the brain was dissected and homogenized in RIPA  
184 extraction buffer (10mM HEPES/NaOH pH 7.4, 150mM NaCl, 1% Triton X-100, 1% SDS) with  
185 protease inhibitors (Calbiochem Protease Inhibitor Set V EDTA-free). Western blot analysis was  
186 performed with Bio-Rad wet transfer system and PVDF membrane (Millipore). The rat anti-MBP  
187 antibody (Abcam [clone 12] ab7349; RRID:AB\_305869) was used at 1:5000 in 5% skim milk,  
188 allowing the blot to incubate overnight at 4°C. Incubation with the secondary antibody, goat anti-rat

189 HRP (Jackson Immunoresearch 112-035-167; RRID:AB\_2338139), was performed at 1:20 000 in  
190 5% skim milk for 1 h at room temperature. The blots were developed with Immobilon Western  
191 chemiluminescent HRP substrate (WBKLS0500).

## 192 **Immunohistochemistry**

193 Animals were anesthetized in 0.02% MS-222, fixed by immersion in 4% paraformaldehyde  
194 (Cedarlane (EMS) 15735-30-S) in PBS for 1 hr at room temperature, transferred to ice-cold 100%  
195 methanol, and post-fixed overnight at  $-20^{\circ}\text{C}$ . Samples were then washed for 1 h in a solution of  
196 100 mM Tris/HCl, pH7.4 with 100 mM NaCl. Infiltration and cryoprotection of the samples was  
197 performed by incubation overnight at room temperature in a solution of 15% fish gelatin (Norland  
198 HP-03) with 15% sucrose, and subsequently repeated in 25% fish gelatin with 15% sucrose.  
199 Samples were embedded and frozen in a solution of 20% fish gelatin with 15% sucrose for  
200 cryosectioning. Sections were acquired in the horizontal orientation at 20  $\mu\text{m}$  thickness on a  
201 cryostat and directly mounted onto Superfrost-plus slides (Fisher).

202 Slides were incubated with blocking solution (10% bovine serum albumin and 5% normal  
203 goat serum in PBS). Sections were immunostained with rat anti-MBP antibody (1:200; Abcam  
204 [clone 12] ab7349; RRID:AB\_305869), mouse 3A10 (1:400; DSHB Hybridoma Product 3A10;  
205 RRID:AB\_531874), and cell nuclei counterstained with DAPI (1:1000; Invitrogen D-1306;  
206 RRID:AB\_2629482). The 3A10 monoclonal antibody is neuron-specific(29), preferentially labelling  
207 a subset of hindbrain spinal cord projecting neurons(30) and RGC axons(15). The secondary  
208 antibodies used were goat anti-rat IgG Cy3 (1:200; Jackson Immunoresearch 112-165-175;  
209 RRID:AB\_2338252) and goat anti-mouse IgG Alexa-647 (1:200; Invitrogen A21236;  
210 RRID:AB\_2535805). We used highly cross-adsorbed secondary antibodies in all instances to  
211 prevent cross-reactivity between mouse and rat primary antibodies. Images were acquired with  
212 10x/0.40 CS, 40x/1.30 oil CS2, or 63x/1.40 oil CS2 objectives at a Leica SP8 confocal microscope.

## 213 **Third Harmonic Generation Microscopy**

214 Third harmonic generation (THG) imaging was performed on a custom-built laser scanning  
215 microscope with forward detection as described in detail by Kazarine et al(31). The setup used a  
216 customized upright multiphoton microscope (FV1200 MPE, Olympus Canada Inc, ON, Canada)  
217 equipped with a motorized stage and a 25x water immersion objective (1.05 NA; 2 mm working  
218 distance; XLPL25XWMP(F), Olympus Canada Inc, ON, Canada). Samples were excited by a  
219 Ti:Sapphire laser (Mira 900F, Coherent, CA) pumped by a 532 nm laser (Verdi V18, Coherent, CA).  
220 The excitation laser provides 200 fs pulses at a 76 MHz repetition rate and feeds into an optical  
221 parametric oscillator (Mira OPO, Coherent, California, U.S.A.), enabling 1150 nm pulses with a  
222 femtosecond pulse length necessary to serve the momentum conservation law (phase matching  
223 condition) for THG. 50 mW continuous power was measured at the plane of the sample. The

224 emission light was split spectrally by a dichroic mirror (T425 lpxr, Chroma Technology), separating  
225 third and second harmonic generation or respective two-photon emission, thus allowing for  
226 simultaneous acquisition of two wavelengths with separate point detection on two photomultipliers  
227 for raster scan imaging. To detect THG signal, we collected the light through a 380–420 nm filter  
228 (ET400/40X, Chroma Technology, Vermont, USA), and to detect MBP immunostaining (secondary  
229 antibody Cy3), we used a 570–630 nm filter (ET600/60, Chroma Technology, Vermont, USA).  
230 Image stacks were acquired from 20  $\mu\text{m}$  thick horizontal sections immunostained for MBP (1:200  
231 rat anti-MBP, 1:200 goat anti-rat Cy3). Images were denoised using CANDLE(32) non-local means  
232 denoising software implemented in MATLAB (MathWorks), which can be found at  
233 <https://sites.google.com/site/pierrickcoupe/softwares/denoising-for-medical-imaging/multiphoton->  
234 filtering.

### 235 **mRNA Synthesis for Blastomere Injections**

236 To synthesize the mRNA for blastomere injections, GCaMP6s (Addgene plasmid 40753) and  
237 mCherry (plasmid gift of Dr Keith Murai) were each cloned into the pCS2+ vector. The GCaMP6s  
238 plasmid was cut with NotI / Klenow fill in / BglII, the mCherry plasmid was cut with BamHI / EcoRV,  
239 and the pCS2+ vector was cut with BamHI / SnaB1. The plasmids were linearized with NotI, and  
240 the capped mRNA of GCaMP6s and mCherry were transcribed with the SP6 mMessage mMachine  
241 Kit (Ambion, Thermo Fisher).

### 242 **Calcium Imaging by Two-Photon Microscopy**

243 Bilateral mosaic tadpoles expressing GCaMP6s at stage 48 were immobilized in 2 mM  
244 pancuronium dibromide (Cedarlane/Tocris 0693) and embedded in 1% low melting point agarose  
245 in a petri dish filled with 0.1X MBSH. For visual stimulation, 10 ms full-field light flashes at different  
246 frequencies were generated with a red luxeon LED placed next to the petri dish and controlled by  
247 an Arduino UnoR3 board (RRID:SCR\_017284). Animals were imaged with a 20X water-immersion  
248 objective (1.0 NA) mounted on a commercial high-speed resonance scanner-based multiphoton  
249 microscope (Thorlabs) with piezoelectric objective focusing (Physik Instruments). GCaMP6s  
250 fluorescence was excited using Spectra Physics InSight X2 femtosecond pulsed laser tuned to 910  
251 nm. Emission signal was detected with a GaAsP photomultiplier tube behind a 525/50 nm bandpass  
252 filter. Calcium signal was recorded from a single optical section (250  $\mu\text{m}$  x 250  $\mu\text{m}$  imaging field),  
253 focusing on the neuropil region of one tectal hemisphere. 20 s after initiating capture, the animal  
254 was shown a 1 min test stimulus (5 flashes of 20 ms duration, presented 15 s apart), followed by  
255 10 minutes of continuous LED flashes at the chosen frequency of stroboscopic illumination (or no  
256 flashes for the spontaneous activity condition), immediately followed by another 1 min of the test  
257 stimulus. This was followed by a 5 min rest period between trials, then the stimulus sequence was

258 repeated with the next strobe frequency being tested. The strobe frequencies tested were 0.0625  
259 Hz, 0.25 Hz, 0.5 Hz, 1 Hz, 2 Hz, and 4 Hz.

## 260 **Quantification and Statistical Analysis**

### 261 Calcium Imaging Analysis

262 Calcium recordings were registered using NoRMCorre(33), and analyzed using custom Matlab  
263 scripts. For each animal, the calcium signal was averaged over the neuropil region, the  $\Delta F / F$  trace  
264 was calculated using the 20th percentile as baseline, then the signal corresponding to the strobe  
265 period was detrended with a fourth-degree polynomial before performing Fourier spectral analyses.  
266 The code for analysis of calcium responses to stroboscopic visual stimulation can be found at:  
267 [https://github.com/RuthazerLab/Myelination\\_Strobe-Ca2-Analysis](https://github.com/RuthazerLab/Myelination_Strobe-Ca2-Analysis).

### 268 MBP-masked 3A10 Volume Analysis

269 Following immunohistochemical processing of tadpoles reared in strobe or ambient light for 7 d,  
270 image stacks of each section containing the optic chiasm were exported to Imaris 9.2 (Bitplane) for  
271 3D reconstruction of the chiasm and analysis in a blinded fashion. First, sequential stacks for each  
272 optic chiasm per animal were imported into the same file and manually aligned for 3D visualization.  
273 For each stack, the surface creation function in Imaris was used to automatically construct a surface  
274 from the MBP channel, setting the background subtraction with surface detail at 0.118  $\mu\text{m}$  and  
275 largest sphere diameter at 20  $\mu\text{m}$ , thresholding automatically, with the final seed points approved  
276 by visual inspection. To study ensheathed axons at the chiasm, the 3A10 channel was masked  
277 with the MBP surface, and this masked channel was used to construct the MBP-masked 3A10  
278 surface, using the same rendering parameters as the initial MBP surface. The volumes of the MBP-  
279 masked 3A10 surface were summed to find the total volume of MBP-associated axons at the optic  
280 chiasm.

### 281 Statistical analysis

282 Statistical analysis was performed in GraphPad Prism 8.0, and the details for each experiment can  
283 be found in the figure legend and figures. For the MBP-masked 3A10 volume, the ROUT test  
284 indicated one outlier (from 1Hz strobe group) that was removed.

285 **References**

- 286 1. Pajevic S, Basser PJ, & Fields RD (2014) Role of myelin plasticity in oscillations and  
287 synchrony of neuronal activity. *Neuroscience* 276:135-147.
- 288 2. Noori R, *et al.* (2020) Activity-dependent myelination: A glial mechanism of oscillatory  
289 self-organization in large-scale brain networks. *Proc Natl Acad Sci U S A* 117(24):13227-  
290 13237.
- 291 3. Fields RD (2015) A new mechanism of nervous system plasticity: activity-dependent  
292 myelination. *Nat Rev Neurosci* 16(12):756-767.
- 293 4. Chorghay Z, Karadottir RT, & Ruthazer ES (2018) White Matter Plasticity Keeps the  
294 Brain in Tune: Axons Conduct While Glia Wrap. *Front Cell Neurosci* 12:428.
- 295 5. Xin W & Chan JR (2020) Myelin plasticity: sculpting circuits in learning and memory. *Nat*  
296 *Rev Neurosci* 21(12):682-694.
- 297 6. Kutsarova E, Munz M, & Ruthazer ES (2016) Rules for Shaping Neural Connections in  
298 the Developing Brain. *Front Neural Circuits* 10:111.
- 299 7. Nanba R, Fujita N, & Nagata S (2010) Structure and expression of myelin basic protein  
300 gene products in *Xenopus laevis*. *Gene* 459(1-2):32-38.
- 301 8. Harauz G, *et al.* (2004) Myelin basic protein-diverse conformational states of an  
302 intrinsically unstructured protein and its roles in myelin assembly and multiple sclerosis.  
303 *Micron* 35(7):503-542.
- 304 9. Lazar G & Szekely G (1967) Golgi studies on the optic center of the frog. *J Hirnforsch*  
305 9(4):329-344.
- 306 10. Yoshida M (1997) Oligodendrocyte maturation in *Xenopus laevis*. *J Neurosci Res*  
307 50(2):169-176.
- 308 11. Farrar MJ, Wise FW, Fetcho JR, & Schaffer CB (2011) In vivo imaging of myelin in the  
309 vertebrate central nervous system using third harmonic generation microscopy. *Biophys J*  
310 100(5):1362-1371.
- 311 12. Lim H, *et al.* (2014) Label-free imaging of Schwann cell myelination by third harmonic  
312 generation microscopy. *Proc Natl Acad Sci U S A* 111(50):18025-18030.
- 313 13. Debarre D, *et al.* (2006) [Second- and third-harmonic generation microscopies for the  
314 structural imaging of intact tissues]. *Med Sci (Paris)* 22(10):845-850.
- 315 14. Nieuwkoop PDF, J. (1994) *Normal Table of Xenopus laevis (Daudin)*. (Garland  
316 Publishing, New York).
- 317 15. Manitt C, Nikolakopoulou AM, Almarino DR, Nguyen SA, & Cohen-Cory S (2009) Netrin  
318 participates in the development of retinotectal synaptic connectivity by modulating axon  
319 arborization and synapse formation in the developing brain. *J Neurosci* 29(36):11065-  
320 11077.
- 321 16. Storey KG, Crossley JM, De Robertis EM, Norris WE, & Stern CD (1992) Neural  
322 induction and regionalisation in the chick embryo. *Development* 114(3):729-741.
- 323 17. Brickley SG, Dawes EA, Keating MJ, & Grant S (1998) Synchronizing retinal activity in  
324 both eyes disrupts binocular map development in the optic tectum. *J Neurosci*  
325 18(4):1491-1504.
- 326 18. Schmidt JT & Buzzard M (1993) Activity-driven sharpening of the retinotectal projection in  
327 goldfish: development under stroboscopic illumination prevents sharpening. *J Neurobiol*  
328 24(3):384-399.
- 329 19. Kim KJ & Rieke F (2001) Temporal contrast adaptation in the input and output signals of  
330 salamander retinal ganglion cells. *J Neurosci* 21(1):287-299.
- 331 20. Demas JA, Payne H, & Cline HT (2012) Vision drives correlated activity without patterned  
332 spontaneous activity in developing *Xenopus* retina. *Dev Neurobiol* 72(4):537-546.
- 333 21. Stevens B, Tanner S, & Fields RD (1998) Control of myelination by specific patterns of  
334 neural impulses. *J Neurosci* 18(22):9303-9311.
- 335 22. Nagy B, Hovhannisyan A, Barzan R, Chen TJ, & Kukley M (2017) Different patterns of  
336 neuronal activity trigger distinct responses of oligodendrocyte precursor cells in the  
337 corpus callosum. *PLoS Biol* 15(8):e2001993.

- 338 23. Stedehouder J, Brizee D, Shpak G, & Kushner SA (2018) Activity-Dependent Myelination  
339 of Parvalbumin Interneurons Mediated by Axonal Morphological Plasticity. *J Neurosci*  
340 38(15):3631-3642.
- 341 24. Yang SM, Michel K, Jokhi V, Nedivi E, & Arlotta P (2020) Neuron class-specific  
342 responses govern adaptive myelin remodeling in the neocortex. *Science* 370(6523).
- 343 25. Krasnow AM, Ford MC, Valdivia LE, Wilson SW, & Attwell D (2018) Regulation of  
344 developing myelin sheath elongation by oligodendrocyte calcium transients in vivo. *Nat*  
345 *Neurosci* 21(1):24-28.
- 346 26. Baraban M, Koudelka S, & Lyons DA (2018) Ca (2+) activity signatures of myelin sheath  
347 formation and growth in vivo. *Nat Neurosci* 21(1):19-23.
- 348 27. Tyssowski KM, *et al.* (2018) Different Neuronal Activity Patterns Induce Different Gene  
349 Expression Programs. *Neuron* 98(3):530-546 e511.
- 350 28. Benfey NJ, Li, V. J., Schohl, A., Ruthazer, E. S. (2020) Sodium-Calcium Exchanger  
351 Mediates Sensory-Evoked Glial Calcium Transients in the Developing Retinotectal  
352 System. *bioRxiv*.
- 353 29. Furley AJ, *et al.* (1990) The axonal glycoprotein TAG-1 is an immunoglobulin superfamily  
354 member with neurite outgrowth-promoting activity. *Cell* 61(1):157-170.
- 355 30. Brand M, *et al.* (1996) Mutations in zebrafish genes affecting the formation of the  
356 boundary between midbrain and hindbrain. *Development* 123:179-190.
- 357 31. Kazarine A, Gopal AA, & Wiseman PW (2019) Nonlinear microscopy of common  
358 histological stains reveals third harmonic generation harmonophores. *Analyst*  
359 144(10):3239-3249.
- 360 32. Coupe P, Munz M, Manjon JV, Ruthazer ES, & Collins DL (2012) A CANDLE for a  
361 deeper in vivo insight. *Med Image Anal* 16(4):849-864.
- 362 33. Pnevmatikakis EA & Giovannucci A (2017) NoRMCorre: An online algorithm for  
363 piecewise rigid motion correction of calcium imaging data. *J Neurosci Methods* 291:83-  
364 94.
